# Supplementary material
Source: HighWire-hosted journal article supplement (https://jnm.snmjournals.org/highwire/filestream/95049/field_highwire_adjunct_files/0/179697_Supplemental_Data.pdf)
Supplement: 179697_Supplemental_Data.pdf [file 179697_Supplemental_Data.pdf]

## Supplemental Table 1

### Segmental changes of WM in polar map

| Segment     | Pre-rad   | 3 mo post-rad | <i>p</i> | Pre-rad   | 6 mo post-rad | <i>p</i> | Pre-rad   | 12 mo post-rad | <i>p</i> |
|-------------|-----------|---------------|----------|-----------|---------------|----------|-----------|----------------|----------|
| <b>A</b>    |           |               |          |           |               |          |           |                |          |
| basal       | 5.9 ± 0.3 | 5.6 ± 0.4     | 0.150    | 5.5 ± 0.4 | 5.1 ± 0.3     | 0.082    | 5.2 ± 0.3 | 4.7 ± 0.6      | 0.087    |
| middle      | 5.5 ± 0.5 | 5.2 ± 0.7     | 0.474    | 5.3 ± 0.3 | 4.9 ± 0.4     | 0.082    | 5.3 ± 0.3 | 3.9 ± 0.8      | 0.003    |
| apical      | 5.8 ± 0.4 | 5.3 ± 0.6     | 0.125    | 5.6 ± 0.5 | 4.1 ± 1.3     | 0.021    | 5.6 ± 0.5 | 4.4 ± 0.3      | <0.001   |
| <b>AS</b>   |           |               |          |           |               |          |           |                |          |
| basal       | 3.4 ± 0.4 | 3.5 ± 0.9     | 0.640    | 3.4 ± 0.4 | 2.9 ± 0.1     | 0.013    | 3.4 ± 0.4 | 2.8 ± 0.4      | 0.029    |
| middle      | 4.5 ± 0.7 | 4.6 ± 0.4     | 0.959    | 4.5 ± 0.7 | 4.7 ± 0.7     | 0.746    | 4.3 ± 0.4 | 3.5 ± 0.4      | 0.009    |
| apical      | 5.6 ± 0.4 | 5.2 ± 0.6     | 0.207    | 5.3 ± 0.2 | 4.8 ± 0.6     | 0.115    | 5.3 ± 0.2 | 3.5 ± 1.1      | 0.002    |
| <b>IS</b>   |           |               |          |           |               |          |           |                |          |
| basal       | 5.1 ± 0.3 | 5.0 ± 0.2     | 0.444    | 5.0 ± 0.2 | 4.0 ± 0.2     | <0.001   | 5.0 ± 0.2 | 4.2 ± 0.4      | 0.002    |
| middle      | 5.9 ± 1.0 | 6.1 ± 0.4     | 0.630    | 5.4 ± 0.8 | 4.6 ± 0.6     | 0.065    | 5.3 ± 0.7 | 5.1 ± 0.5      | 0.695    |
| apical      | 6.7 ± 0.3 | 6.4 ± 0.1     | 0.080    | 6.3 ± 0.2 | 6.4 ± 0.3     | 0.468    | 6.0 ± 0.1 | 5.5 ± 0.7      | 0.145    |
| <b>I</b>    |           |               |          |           |               |          |           |                |          |
| basal       | 6.2 ± 0.5 | 6.3 ± 0.3     | 0.793    | 6.2 ± 0.5 | 6.1 ± 0.3     | 0.517    | 6.0 ± 0.3 | 5.9 ± 0.9      | 0.631    |
| middle      | 6.4 ± 0.5 | 6.6 ± 0.2     | 0.504    | 6.3 ± 0.5 | 6.2 ± 0.3     | 0.550    | 6.1 ± 0.4 | 6.1 ± 0.1      | 0.663    |
| apical      | 6.5 ± 0.3 | 6.5 ± 0.1     | 0.801    | 6.3 ± 0.1 | 6.3 ± 0.3     | 0.819    | 6.1 ± 0.2 | 5.9 ± 0.3      | 0.341    |
| <b>IL</b>   |           |               |          |           |               |          |           |                |          |
| basal       | 6.4 ± 0.3 | 6.4 ± 0.2     | 1.000    | 6.2 ± 0.3 | 6.1 ± 0.6     | 0.900    | 6.0 ± 0.3 | 4.5 ± 0.4      | 0.000    |
| middle      | 6.1 ± 0.3 | 6.3 ± 0.6     | 0.552    | 6.2 ± 0.2 | 6.1 ± 0.3     | 0.830    | 6.0 ± 0.2 | 6.1 ± 0.2      | 0.202    |
| apical      | 6.4 ± 0.3 | 6.3 ± 0.3     | 0.641    | 6.2 ± 0.1 | 5.9 ± 1.0     | 0.488    | 5.9 ± 0.2 | 5.8 ± 0.3      | 0.276    |
| <b>AL</b>   |           |               |          |           |               |          |           |                |          |
| basal       | 6.3 ± 0.3 | 6.4 ± 0.4     | 0.929    | 6.3 ± 0.3 | 5.2 ± 0.4     | <0.001   | 6.0 ± 0.2 | 4.8 ± 0.6      | <0.001   |
| middle      | 6.0 ± 0.3 | 6.1 ± 0.4     | 0.777    | 6.0 ± 0.3 | 6.0 ± 0.6     | 0.951    | 5.8 ± 0.2 | 5.8 ± 0.5      | 0.888    |
| apical      | 6.2 ± 0.5 | 6.5 ± 0.4     | 0.325    | 6.1 ± 0.4 | 6.3 ± 0.2     | 0.313    | 6.1 ± 0.4 | 3.9 ± 0.5      | <0.001   |
| <b>Apex</b> |           |               |          |           |               |          |           |                |          |
| A           | 6.1 ± 0.3 | 5.9 ± 0.6     | 0.499    | 6.1 ± 0.3 | 3.4 ± 1.4     | 0.001    | 6.1 ± 0.3 | 3.5 ± 0.6      | <0.001   |
| I           | 6.1 ± 0.6 | 5.7 ± 0.3     | 0.151    | 5.9 ± 0.5 | 5.7 ± 1.2     | 0.703    | 6.0 ± 0.5 | 3.2 ± 0.4      | <0.001   |

WM = wall motion; pre-rad = before irradiation; post-rad = post-irradiation; Mo = month; A = anterior; AS = anteroseptal; IS = inferoseptal; I = inferior; IL = inferolateral; AL = anterolateral

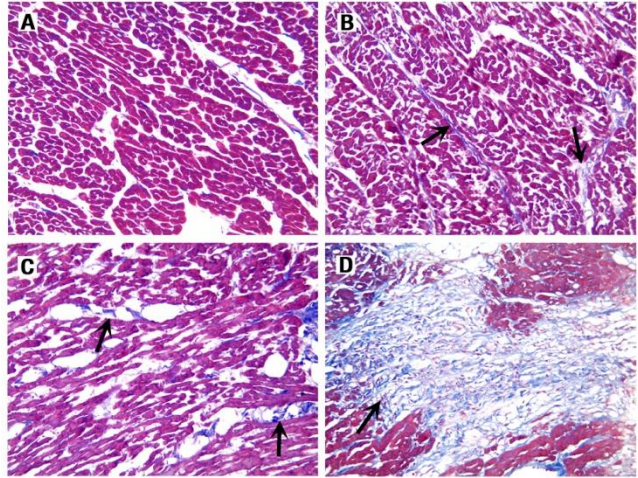

**Supplemental Figure 1.** Masson staining of myocardium in the control group (A) and in the irradiation group at 3, 6, and 12 mo (B-D) after irradiation with x200 magnification; myocardial interstitial fibrosis was progressively increased with time prolonged after irradiation.

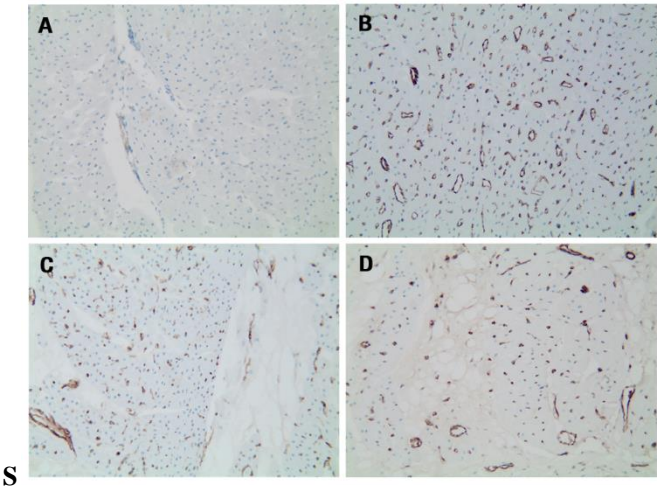

**Supplemental Figure 2.** CD31 immunohistochemical staining of myocardium in the control group (A) and in the irradiation group at 3, 6, and 12 mo (B-D) with x200 magnification; Myocardial interstitial microvessel density was significantly increased in the irradiation area at three months after irradiation and gradually decreased at 6 and 12 mo after irradiation.
